# Supplementary material for: 6MNEP: a molecular cation with large hyperpolarizability and promise for nonlinear optical applications
Source: Royal Society of Chemistry journal article supplement (doi:10.1039/d0tc01829e), 2020-01-01
Supplement: d0tc01829e1.pdf [file d0tc01829e1.pdf]

## Supporting Information for

### 6MNEP: A molecular cation with large hyperpolarizability and promising for nonlinear optical applications

#### 1. Organic Synthesis and NMR Characterization

6MNEP, MBDM, and DACS compounds were synthesized in a similar manner. Here, we explain the synthesis of 6MENP-T as procedure example.

**Methyl 4-methylbenzenesulfonate:** Metallic sodium (1.63g, 1eq) was weighed out, washed with hexanes and reacted with dry methanol (80 mL) to produce sodium methoxide. This solution was dropwise added to a 4-methylbenzenesulfonyl chloride/DCM solution (10g in 200 ml of solution) and the solvent evaporated. The resulting solids were extracted with DCM and water, dried over sodium sulfate, and the solvent was removed at reduced pressure. Methyl 4-chlorobenzenesulfonate (83% yield) was obtained and used in the next step without further purification.

**1,4-dimethylpyridin-1-ium 4-methylbenzenesulfonate:** 4-picoline (12g, 2 eq) was combined with 4-methylbenzenesulfonate (10.5g, 1eq) in toluene. The mixture was stirred at 100°C for 3h, then the precipitated solids were filtered and washed with toluene. A white powder was recovered and identified as 1,4-dimethylpyridin-1-ium 4-methylbenzenesulfonate (98% yield)

**(E)-4-(2-(6-methoxynaphthalen-2-yl)vinyl)-1-methylpyridin-1-ium 4-methylbenzenesulfonate (6MNEP-T):** 1,4-dimethylpyridin-1-ium 4-chlorobenzenesulfonate (17g, 1eq) was combined with 6-methoxy naphthaldehyde (8.13g, 1eq) in ethanol at room temperature. Piperidine (50 drops) was added and the reaction was stirred at room temperature for 3 days. A yellow solid was recovered by filtration and washed with toluene to afford 6MNEP-T (65 %yield).

6DMIQ and 6MEIQ derivatives were obtained using Wittig and Heck reactions. The different steps to obtain 6DMIQ-T are detailed below:

**N,N-dimethyl-4-vinylaniline:** To a stirred solution of methyltriphenylphosphonium bromide in dry THF (1 eq, 0.12 M), *n*-Butyl lithium (1 eq) was added dropwise. The resulting solution was stirred for 15 minutes and then 4-(dimethylamino)benzaldehyde (1 eq) was added. After 3h, saturated ammonium chloride was added and the resulting mixture was extracted with DCM. The extracted organic layers were dried over Na<sub>2</sub>SO<sub>4</sub> and concentrated *in vacuo*. The final product was purified by column chromatography (1:2, ethyl acetate:hexanes)

**(E)-4-(2-(isoquinolin-6-yl)vinyl)-N,N-dimethylaniline:** N,N-dimethyl-4-vinylaniline (1.25 eq) was combined with 6-bromoisoquinoline (1 eq) in dry trimethylamine. The Pd(OAc)<sub>2</sub> catalyst (0.02 eq) and tri-*o*-tolyl phosphine (0.04 eq) were added and the reaction was stirred

for 48h at 80°C. The reaction mixture was concentrated by evaporation of the solvent and column chromatography (1:4, ethyl acetates:hexanes) afforded the purified coupled product.

**(E)-6-(4-(dimethylamino)styryl)-2-methylisoquinolin-2-ium 4-methylbenzenesulfonate (6DMIQ-T):** The coupled product obtained in the previous step was reacted with methyl 4-methylbenzenesulfonate in toluene at 80°C for 24h. The resulting organic salt was collected by filtration. (Yield, 98%)

NMR characterization was performed in a 500 MHz spectrometer. All compounds were dissolved in DMSO-d<sub>6</sub> and the shifts are reported with respect to TMS.

**(E)-6-(4-methoxystyryl)isoquinoline (6MEIQ):** <sup>1</sup>H NMR (500 MHz, C<sub>2</sub>D<sub>6</sub>OS), 9.195 (s, 1H), 8.501 (s, 1H), 7.932 (d, J: 8.01Hz, 1H), 7.826 (d, J: 8.01Hz, 1), 7.784 (s, 1H), 7.612 (s, 1H), 7.520 (d, J: 7.01Hz), 7.296-7.232 (m, 3H), 7.180-7.098 (m, 1H), 6.942 (d, J: 7.01Hz, 2H), 3.853 (s, 3H).

**(E)-4-(2-(6-methoxynaphthalen-2-yl)vinyl)-1-methylpyridin-1-ium 4-methylbenzenesulfonate (6MNEP-T):** <sup>1</sup>H NMR (500 MHz, C<sub>2</sub>D<sub>6</sub>OS), 8.842 (d, J: 6.72 Hz, 2H) 8.221 (d, J: 6.60 Hz, 2H), 8.126 (t, 2H), 7.915 (m, 3H), 7.574 (d, J: 16.38Hz, 1H), 7.465 (d, J: 7.94 Hz, 2H), 7.391 (d, J: 2.32 Hz, 1H), 7.235 (dd, J1: 2.44 Hz, J2: 6.48 Hz, 1H), 7.10 (d, J: 7.95 Hz, 2H), 4.247 (s, 3H), 3.906 (s, 3H), 2.279 (s, 3H). Yield: 42%.

**(E)-4-(2-(6-methoxynaphthalen-2-yl)vinyl)-1-methylpyridin-1-ium 4-nitrobenzenesulfonate (6MNEP-4NBS):** <sup>1</sup>H NMR (500 MHz, C<sub>2</sub>D<sub>6</sub>OS), 8.822 (d, J:6.72 Hz, 2H), 8.205 ( m, 4H), 8.105 (t, 2H), 7.917 (m, 3H), 7.8425 (t, 2H), 7.573 ( d, J: 16.26 Hz, 1H), 7.441 (d, J: 12.35 Hz, 1H), 7.211 (dd, J1: 2.57 Hz, J2: 6.35 Hz, 1H), 4.247 (s, 3H), 3.906 (s, 3H). Yield: 45%.

**(E)-6-(4-methoxystyryl)-2-methylisoquinolin-2-ium 4-methylbenzenesulfonate (6MEIQ-T):** <sup>1</sup>H NMR (500 MHz, C<sub>2</sub>D<sub>6</sub>OS), 9.805 (s, 1H), 8.594 (s, 1H), 8.427-8.374 (m, 2H), 8.375-8.288 (m, 2H), 7.775-7.662 (m, 3H), 7.489-7.296 (m, 3H), 7.106 (d, J: 6.61Hz, 2H), 7.036 (d, J: 6.61Hz, 2H), 4.413 (s, 3H), 3.817 (s, 3H), 2.284 (s, 3H). Yield: 44%.

**(E)-6-(4-methoxystyryl)-2-methylisoquinolin-2-ium 4-nitrobenzenesulfonate (6MEIQ-4NBS):** <sup>1</sup>H NMR (500 MHz, C<sub>2</sub>D<sub>6</sub>OS), 9.798 (s, 1H), 8.606 (d, J: 6.88 Hz, 1H), 8.407 (t, J: 6.69 Hz, 2H), 8.356-8.308 (m, 2H), 8.201 (d, J: 6.84 Hz, 2H), 7.832 (d, J: 6.85 Hz, 2H), 7.753-7.696 (m, 3H), 7.452 (d, J: 16.33 Hz, 1H), 7.041 (d, J: 8.78 Hz, 2H), 4.412 (s, 3H), 3.820 (s, 3H). Yield: 47%.

**4-((1E,3E)-4-(4-methoxyphenyl)buta-1,3-dien-1-yl)-1-methylpyridin-1-ium 4-methylbenzenesulfonate (MBDM-T):** <sup>1</sup>H NMR (500 MHz, C<sub>2</sub>D<sub>6</sub>OS), 8.8567 (d, J:6.73Hz 2H), 7.8758-7.7821 (m, 4H), 7.5121 (m, 3H), 7.1509 (d, J: 7.46Hz, 2H), 7.0109-6.837 (m, 4H), 6.5653 (d, J: 15.74Hz, 1H), 4.468 (s, 3H), 3.8509 (s, 3H), 2.3367 (s, 3H). Yield: 54%.

**4-((1E,3E)-4-(4-methoxyphenyl)buta-1,3-dien-1-yl)-1-methylpyridin-1-ium 4-nitrobenzenesulfonate (MBDM-4NBS):** <sup>1</sup>H NMR (500 MHz, C<sub>2</sub>D<sub>6</sub>OS), 8.758 (d, J: 6.6 Hz, 2H), 8.193 (d, J: 8.68 Hz, 2H), 8.095 (d, J: 6.73 Hz, 2H), 7.827 (d, J: 8.8 Hz, 2H), 7.604 (d, J: 8.55 Hz, 2H), 7.156-1.104 (m, 2H), 7.057-6.977 (m, 3H), 6.824 (d, J: 15.4 Hz, 2H), 4.105 (s, 3H), 3.792 (s, 3H). Yield: 53%.

**(E)-6-(4-(dimethylamino)styryl)-2-methylisoquinolin-2-ium 4-methylbenzenesulfonate (6DMIQ-T):** <sup>1</sup>H NMR (500 MHz, C<sub>2</sub>D<sub>6</sub>OS), 9.725 (s, 1H), 8.546 (d, J: 6.84, 1H), 8.345-8.287 (m, 3H), 8.220 (s, 1H), 7.673 (d, J: 16 Hz, 1H), 7.578 (d, J: 8.8 Hz, 2H), 7.463 (d, J: 7.81 Hz, 2H), 7.288 (d, J: 16 Hz, 1H), 7.103 (d, J: 7.82 Hz, 2H), 6.776 (d, J: 8.68, 2H), 4.380 (s, 3H), 2.992 (s, 6H), 2.281 (s, 3H). Yield: 57%.

**(E)-6-(4-(dimethylamino)styryl)-2-methylisoquinolin-2-ium 4-nitrobenzenesulfonate (6DMIQ-4NBS):** <sup>1</sup>H NMR (500 MHz, C<sub>2</sub>D<sub>6</sub>OS), 9.732 (s, 1H), 8.520 (d, J: 6.84, 1H), 8.315-8.287 (m, 3H), 8.220 (s, 1H), 7.873 (d, J: 16 Hz, 1H), 7.653 (d, J: 8.8 Hz, 2H), 7.385 (d, J: 7.81 Hz, 2H), 7.236 (d, J: 16 Hz, 1H), 7.154 (d, J: 7.82 Hz, 2H), 6.798 (d, J: 8.68, 2H), 4.360 (s, 3H), 2.925 (s, 6H), 2.302 (s, 3H). Yield: 51%.

**4-((1E,3E)-4-(4-(dimethylamino)phenyl)buta-1,3-dien-1-yl)-1-methylpyridin-1-ium 4-methylbenzenesulfonate (DACS-T):** <sup>1</sup>H NMR (500 MHz, C<sub>2</sub>D<sub>6</sub>OS), 8.690 (d, J: 6.88 Hz, 2H), 8.217-8.8.183 (m, 2H), 8.024 (d, J: 6.88Hz, 2H), 7.859-7.763 (m, 3H), 7.471 (d, J: 8.60 Hz, 2H), 7.021-6.996 (m, 2H), 6.752-6.697 (m, 3H), 4.181 (s, 3H), 3.311 (s, 3H), 2.988 (s, 6H). Yield: 49%.

**4-((1E,3E)-4-(4-(dimethylamino)phenyl)buta-1,3-dien-1-yl)-1-methylpyridin-1-ium 4-nitrobenzenesulfonate (DACS-4NBS):** <sup>1</sup>H NMR (500 MHz, C<sub>2</sub>D<sub>6</sub>OS), 8.687 (s, 2H), 8.194 (d, J: 6.70Hz, 2H), 8.018 (s, 2H), 7.857-7.750 (m, 3H), 7.469 (d, J: 7.81Hz, 2H), 7.005 (s, 2H), 6.759-6.690 (m, 3H), 4.177 (s, 3H), 2.986 (s, 6H). Yield: 47%.

## 2. X-ray diffraction analysis

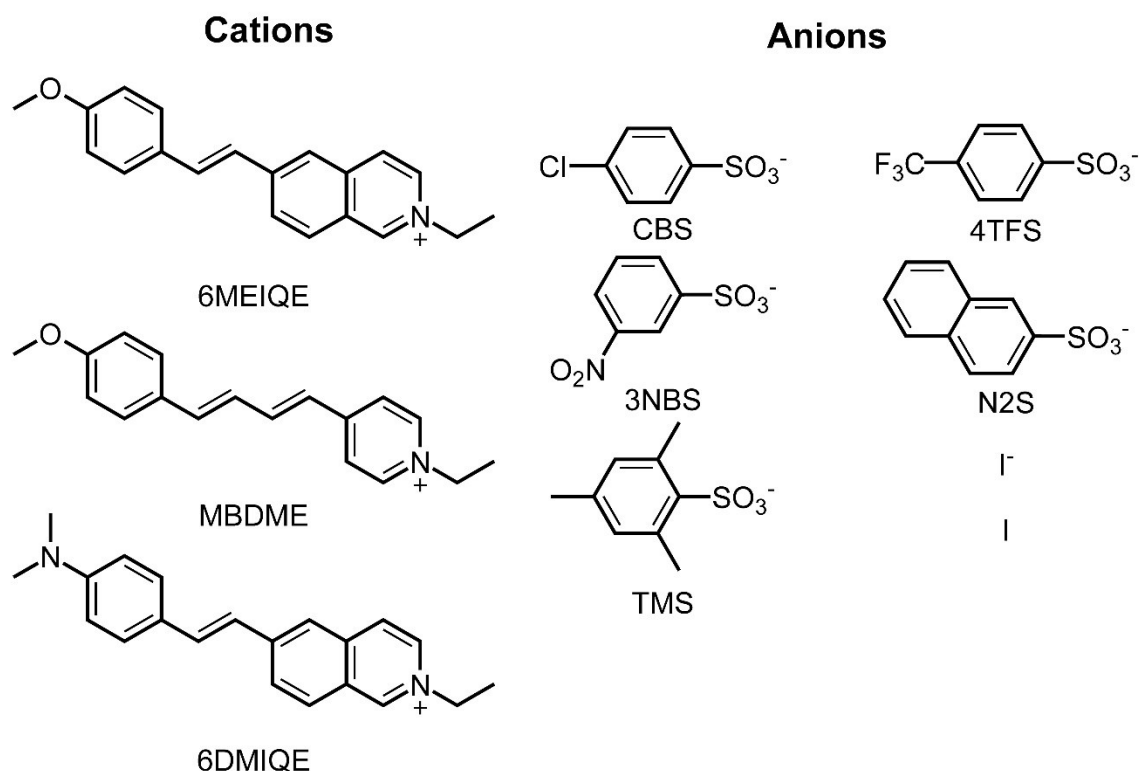

**Figure S1** Molecular structures of ethylated cations, sulfonate anions and iodide

**6MNEP-T:** *Crystal System*, triclinic; *Space Group*, P1; *Point group*, -1; *a*, 6.9488(3) Å; *b*, 8.1027(4) Å; *c*, 9.9927(5) Å;  $\alpha$ , 104.045(3)°;  $\beta$ , 97.177(3)°;  $\gamma$ , 93.047(3)°; *z*, 1;  $R_1$ , 0.0353;  $wR_2$ , 0.0867; *GOF*, 1.069; *CCDC*: 1867834

**6MNEP-T (296 K):** *Crystal System*, triclinic; *Space Group*, P1; *Point group*, -1; *a*, 7.0739(2) Å; *b*, 8.1024(2) Å; *c*, 10.0726 Å;  $\alpha$ , 103.779(1)°;  $\beta$ , 98.209(1)°;  $\gamma$ , 91.338(1)°; *z*, 1;  $R_1$ , 0.0574;  $wR_2$ , 0.1592; *GOF*, 1.074; *CCDC*: 2006490

**6MNEP-4NBS:** *Crystal System*, triclinic; *Space Group*, P1; *Point group*, -1; *a*, 7.1520(2) Å; *b*, 7.9596(3) Å; *c*, 9.8172(3) Å;  $\alpha$ , 102.972(2)°;  $\beta$ , 96.957(2)°;  $\gamma$ , 91.888(2)°; *z*, 1;  $R_1$ , 0.0267;  $wR_2$ , 0.0692; *GOF*, 1.064; *CCDC*: 1867835

**6MEIQ-T:** *Crystal System*, triclinic; *Space Group*, P-1; *Point group*, -1; *a*, 8.2355(5) Å; *b*, 11.1247(7) Å; *c*, 12.4991(6) Å;  $\alpha$ , 86.568(4)°;  $\beta$ , 75.984(4)°;  $\gamma$ , 88.350(4)°; *z*, 2;  $R_1$ , 0.0496;  $wR_2$ , 0.1192; *GOF*, 1.072; *CCDC*: 1990758.

**6MEIQ-4NBS:** *Crystal System*, monoclinic; *Space Group*, P2<sub>1</sub>/c; *Point group*, 2/m; *a*, 10.5725(6) Å; *b*, 6.6821(4) Å; *c*, 32.4379(18) Å;  $\alpha$ , 90°;  $\beta$ , 95.284(3);  $\gamma$ , 90°; *z*, 4;  $R_1$ , 0.0382;  $wR_2$ , 0.1029; *GOF*, 1.030; *CCDC*: 1973403

**MBDM-T:** *Crystal System*, monoclinic; *Space Group*, P2<sub>1</sub>/c; *Point group*, 2/m; *a*, 8.8320(6) Å; *b*, 6.6710(5) Å; *c*, 36.675(3) Å;  $\alpha$ , 90°;  $\beta$ , 95.170(5);  $\gamma$ , 90°; *z*, 4;  $R_1$ , 0.0418;  $wR_2$ , 0.1086; *GOF*, 1.045; *CCDC*: 1962606

**MBDM-4NBS:** *Crystal System*, orthorhombic; *Space Group*, P2<sub>1</sub>2<sub>1</sub>2<sub>1</sub>; *Point group*, 222; *a*, 6.6719(3) Å; *b*, 7.9424(4) Å; *c*, 39.7008(19) Å;  $\alpha$ , 90°;  $\beta$ , 90°;  $\gamma$ , 90°; *z*, 4;  $R_1$ , 0.0435;  $wR_2$ , 0.1114; *GOF*, 1.045; *CCDC*: 1961452

**6DMIQ-T:** *Crystal System*, triclinic; *Space Group*, P-1; *Point group*, -1; *a*, 10.1028(5) Å; *b*, 10.3242(6) Å; *c*, 13.4088(7) Å;  $\alpha$ , 101.539(2)°;  $\beta$ , 108.960(2)°;  $\gamma$ , 106.377(2)°; *z*, 2;  $R_1$ , 0.0618;  $wR_2$ , 0.1669; *GOF*, 1.041; *CCDC*: 1960837

**6DMIQ-4NBS monohydrate 1:** *Crystal System*, monoclinic; *Space Group*, C2/c; *Point group*, 2/m; *a*, 38.437(2) Å; *b*, 7.1832(5) Å; *c*, 20.0502(13) Å;  $\alpha$ , 90°;  $\beta$ , 121.085(3)°;  $\gamma$ , 90°; *z*, 8;  $R_1$ , 0.0479;  $wR_2$ , 0.1381; *GOF*, 1.040; *CCDC*: 1916881

**6DMIQ-4NBS monohydrate 2:** *Crystal System*, monoclinic; *Space Group*, P2<sub>1</sub>/c; *Point group*, 2/m; *a*, 17.8624(4) Å; *b*, 8.1056(2) Å; *c*, 17.3004(4) Å;  $\alpha$ , 90°;  $\beta$ , 110.784°;  $\gamma$ , 90°; *z*, 4;  $R_1$ , 0.0484;  $wR_2$ , 0.1314; *GOF*, 1.083; *CCDC*: 1916886

**DACS-T:** *Crystal System*, triclinic; *Space Group*, P-1; *Point group*, -1; *a*, 9.7592(5) Å; *b*, 10.6361(5) Å; *c*, 13.0359(6) Å;  $\alpha$ , 109.272(3)°;  $\beta$ , 99.244(3)°;  $\gamma$ , 108.409(3)°; *z*, 2;  $R_1$ , 0.0396;  $wR_2$ , 0.1118; *GOF*, 1.040; *CCDC*: 1963594

**DACS-4NBS:** *Crystal System*, monoclinic; *Space Group*, P2<sub>1</sub>/c; *Point group*, 2/m; *a*, 7.5802(6) Å; *b*, 17.0433(13) Å; *c*, 17.5161(14) Å;  $\alpha$ , 90°;  $\beta$ , 91.416(6);  $\gamma$ , 90°; *z*, 4;  $R_1$ , 0.0473;  $wR_2$ , 0.1212; *GOF*, 1.124; *CCDC*: 1964071

**6MNEP-4CF3 ((E)-4-(2-(6-methoxynaphthalen-2-yl)vinyl)-1-methylpyridin-1-ium 4-(trifluoromethyl)benzenesulfonate):** *Crystal System*, monoclinic; *Space Group*, Pn; *Point group*, m; *a*, 7.8208(3) Å; *b*, 7.1973(3) Å; *c*, 19.9675(8) Å;  $\alpha$ , 90°;  $\beta$ , 96.700(2)°;  $\gamma$ , 90°; *z*, 2;  $R_1$ , 0.0278;  $wR_2$ , 0.0727; *GOF*, 1.054; *CCDC*: 1960849

**6MNEP-3NBS ((E)-4-(2-(6-methoxynaphthalen-2-yl)vinyl)-1-methylpyridin-1-ium 4-(trifluoromethyl)benzenesulfonate) :** *Crystal System*, monoclinic; *Space Group*, P2<sub>1</sub>/c; *Point group*, 2/m; *a*, 19.6595(7) Å; *b*, 6.4297(2) Å; *c*, 17.8266(6) Å;  $\alpha$ , 90°;  $\beta$ , 104.903(2)°;  $\gamma$ , 90°; *z*, 2;  $R_1$ , 0.0383;  $wR_2$ , 0.1015; *GOF*, 1.046; *CCDC*: 1960848

**6MEIQE-4NBS ((E)-2-ethyl-6-(4-methoxystyryl)isoquinolin-2-ium 4-nitrobenzenesulfonate):** *Crystal System*, triclinic; *Space Group*, P-1; *Point group*, -1; *a*, 7.085(3) Å; *b*, 7.315(2) Å; *c*, 22.030(7) Å;  $\alpha$ , 90.112(9)°;  $\beta$ , 96.227(10)°;  $\gamma$ , 92.400(18)°; *z*, 2;  $R_1$ , 0.0338;  $wR_2$ , 0.0859; *GOF*, 1.032; *CCDC*: 1973431

**MBDM-N2S (4-((1E,3E)-4-(4-methoxyphenyl)buta-1,3-dien-1-yl)-1-methylpyridin-1-ium naphthalene-2-sulfonate):** *Crystal System*, triclinic; *Space Group*, P-1; *Point group*, -1; *a*, 9.6916(4) Å; *b*, 10.6359(5) Å; *c*, 11.1871(5) Å;  $\alpha$ , 78.992(2)°;  $\beta$ , 79.976(2)°;  $\gamma$ , 89.669(2)°; *z*, 2;  $R_1$ , 0.0317;  $wR_2$ , 0.0828; *GOF*, 1.049; *CCDC*: 1960838

**MBDME-3NBS (1-ethyl-4-((1E,3E)-4-(4-methoxyphenyl)buta-1,3-dien-1-yl)pyridin-1-ium 3-nitrobenzenesulfonate) :** *Crystal System*, monoclinic; *Space Group*, P2<sub>1</sub>/c; *Point group*, 2/m; *a*, 6.3747(2) Å; *b*, 38.0176(14) Å; *c*, 8.8064(3) Å;  $\alpha$ , 90°;  $\beta$ , 92.289(2)°;  $\gamma$ , 90°; *z*, 4;  $R_1$ , 0.0365;  $wR_2$ , 0.0912; *GOF*, 1.063; *CCDC*: 1960839

**MBDME-4NBS (1-ethyl-4-((1E,3E)-4-(4-methoxyphenyl)buta-1,3-dien-1-yl)pyridin-1-ium 4-nitrobenzenesulfonate):** *Crystal System*, orthorhombic; *Space Group*, P2<sub>1</sub>2<sub>1</sub>2<sub>1</sub>; *Point group*, 222; *a*, 6.7363(3) Å; *b*, 8.1126(4) Å; *c*, 39.4951(19) Å;  $\alpha$ , 90°;  $\beta$ , 90°;  $\gamma$ , 90°; *z*, 4;  $R_1$ , 0.0267;  $wR_2$ , 0.0685; *GOF*, 1.062; *CCDC*: 1960840

**MBDME-CBS (1-ethyl-4-((1E,3E)-4-(4-methoxyphenyl)buta-1,3-dien-1-yl)pyridin-1-ium 4-chlorobenzenesulfonate):** *Crystal System*, orthorhombic; *Space Group*, P2<sub>1</sub>2<sub>1</sub>2<sub>1</sub>; *Point group*, 222; *a*, 6.8059(2) Å; *b*, 7.9943(3) Å; *c*, 39.4102(13) Å;  $\alpha$ , 90°;  $\beta$ , 90°;  $\gamma$ , 90°; *z*, 4;  $R_1$ ,

0.0280;  $wR_2$ , 0.0726; *GOF*, 1.035; *CCDC*: 1960847

**MBDME-N2S** (*(1-ethyl-4-((1E,3E)-4-(4-methoxyphenyl)buta-1,3-dien-1-yl)pyridin-1-ium naphthalene-2-sulfonate)*): *Crystal System*, triclinic; *Space Group*, P-1; *Point group*, -1; *a*, 9.7501(6) Å; *b*, 10.9056(6) Å; *c*, 11.4648(6) Å; *a*, 77.261(3)°; *β*, 79.382(4)°; *γ*, 81.917(3)°; *z*, 2; *R*<sub>1</sub>, 0.0311;  $wR_2$ , 0.0834; *GOF*, 1.021; *CCDC*: 1960841

**6DMIQE-4NBS** (*(E)-6-(4-(dimethylamino)styryl)-2-ethylisoquinolin-2-ium 4-nitrobenzenesulfonate*): *Crystal System*, triclinic; *Space Group*, P-1; *Point group*, -1; *a*, 7.5893(7) Å; *b*, 13.5028(11) Å; *c*, 23.829(2) Å; *a*, 95.198(5)°; *β*, 92.280(6)°; *γ*, 99.555(7)°; *z*, 4; *R*<sub>1</sub>, 0.0410;  $wR_2$ , 0.1105; *GOF*, 1.064; *CCDC*: 1916880

**6DMIQE-3NBS** (*(E)-6-(4-(dimethylamino)styryl)-2-ethylisoquinolin-2-ium 3-nitrobenzenesulfonate*): *Crystal System*, triclinic; *Space Group*, P-1; *Point group*, -1; *a*, 8.2165(3) Å; *b*, 9.5708(5) Å; *c*, 15.9375(7) Å; *a*, 97.645(4)°; *β*, 92.675(4)°; *γ*, 93.859(3)°; *z*, 2; *R*<sub>1</sub>, 0.0542;  $wR_2$ , 0.1395; *GOF*, 1.047; *CCDC*: 1916882

**6DMIQE-CBS** (*(E)-6-(4-(dimethylamino)styryl)-2-ethylisoquinolin-2-ium 4-chlorobenzenesulfonate*): *Crystal System*, triclinic; *Space Group*, P-1; *Point group*, -1; *a*, 8.0643(5) Å; *b*, 10.0456(6) Å; *c*, 14.7344(9) Å; *a*, 95.018(3)°; *β*, 96.726(3)°; *γ*, 92.402(3)°; *z*, 2; *R*<sub>1</sub>, 0.0357;  $wR_2$ , 0.0916; *GOF*, 1.049; *CCDC*: 1916884

**6DMIQE-TMS** (*(E)-6-(4-(dimethylamino)styryl)-2-ethylisoquinolin-2-ium 2,4,6-trimethylbenzenesulfonate*): *Crystal System*, triclinic; *Space Group*, P-1; *Point group*, -1; *a*, 8.6019(5) Å; *b*, 10.1226(6) Å; *c*, 15.5819(8) Å; *a*, 95.347(4)°; *β*, 104.070(4)°; *γ*, 105.448(4)°; *z*, 2; *R*<sub>1</sub>, 0.0469;  $wR_2$ , 0.1172; *GOF*, 1.030; *CCDC*: 1916885

**6DMIQE-I** (*(E)-6-(4-(dimethylamino)styryl)-2-ethylisoquinolin-2-ium iodide*): *Crystal System*, orthorhombic; *Space Group*, Pbc<sub>a</sub>; *Point group*, mm2; *a*, 12.7754(6) Å; *b*, 8.5188(5) Å; *c*, 35.3048(16) Å; *a*, 90°; *β*, 90°; *γ*, 90°; *z*, 8; *R*<sub>1</sub>, 0.0422;  $wR_2$ , 0.1041; *GOF*, 1.047; *CCDC*: 1916883

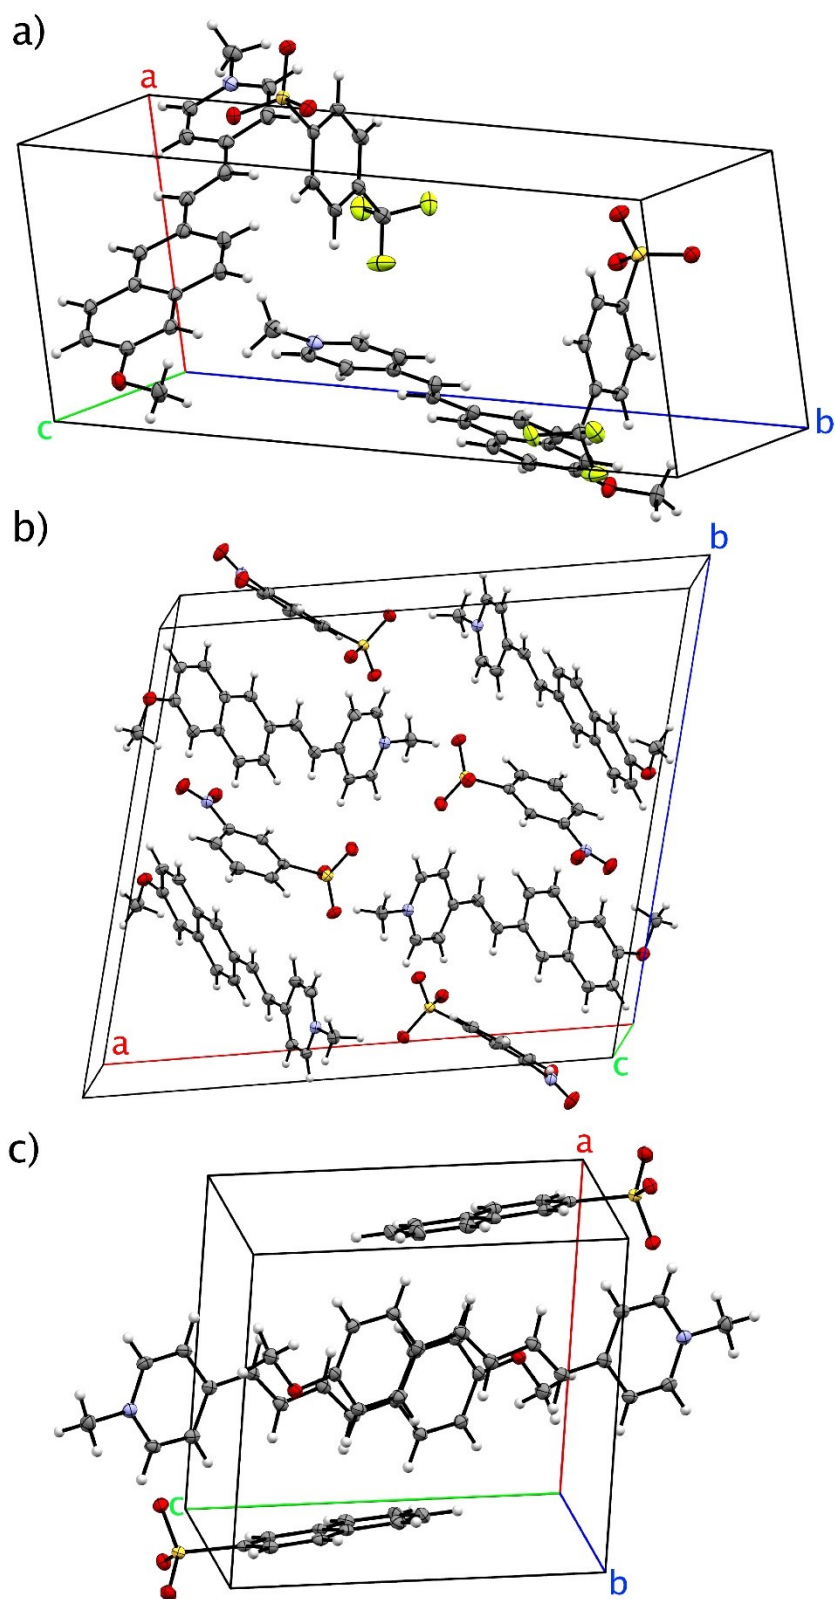

**Figure S2** 6MNEP and MBDM cations paired with different anions, a) 6MNEP-4TFS, b) 6MNEP-3NBS, and c) MBDM-N<sub>2</sub>S,

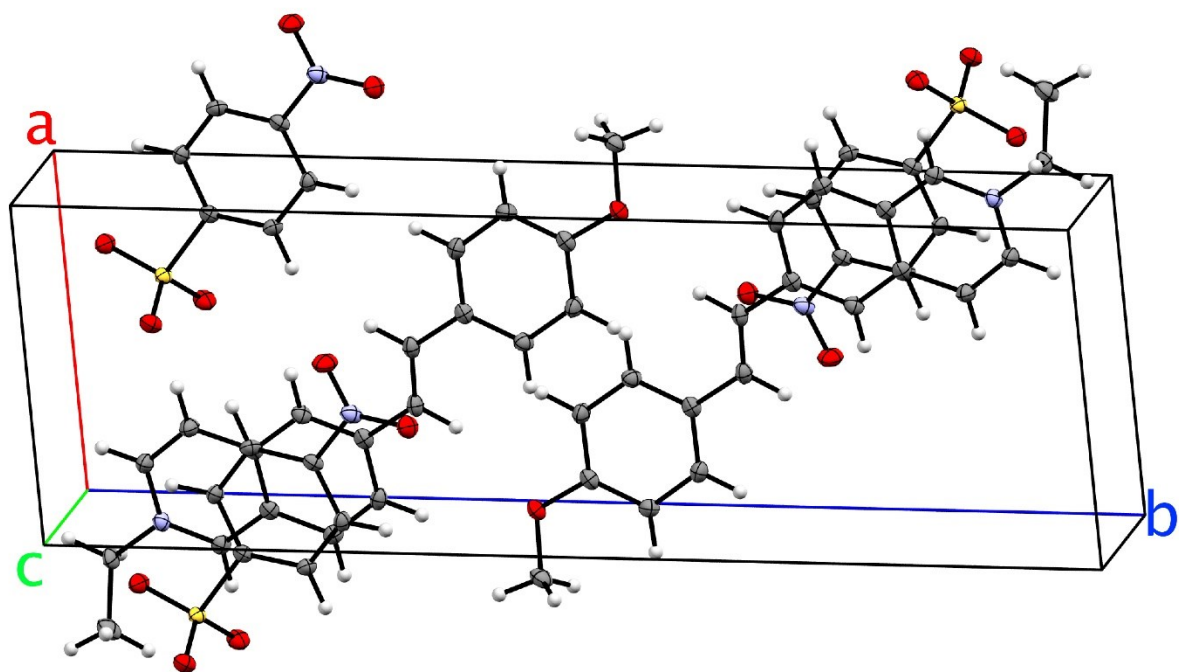

**Figure S3** 6MEIQE cation paired with different anions, a) 6MEIQE-4NBS



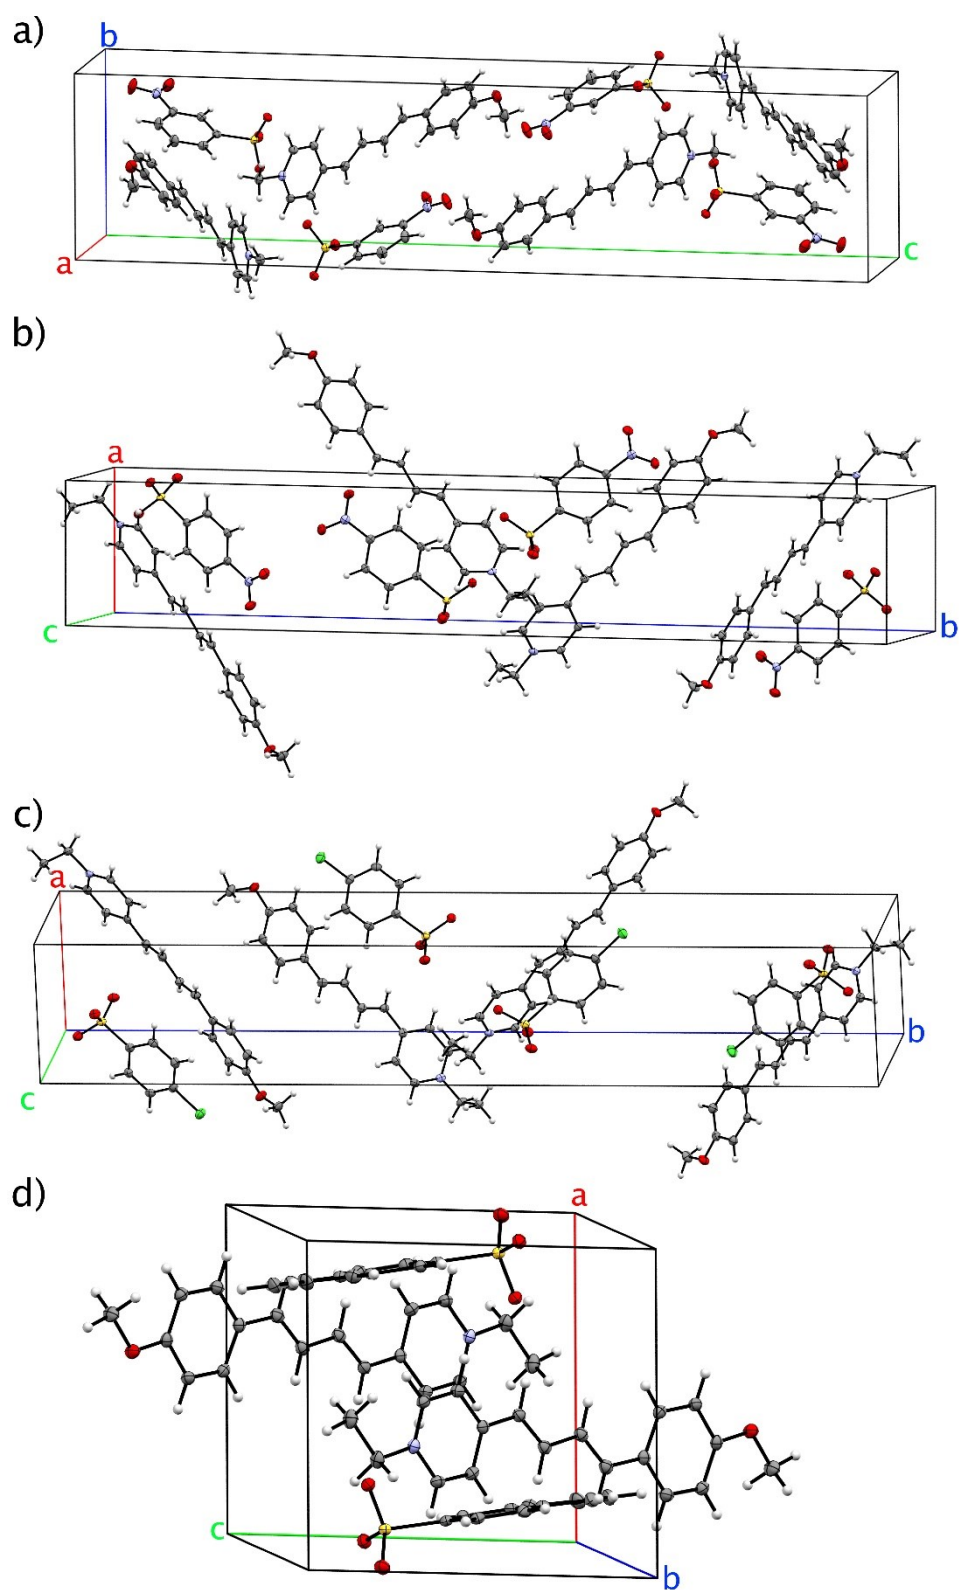

**Figure S4** MBDME cation paired with different anions, a) MBDME-3NBS, b) MBDME-4NBS, c) MBDME-CBS, and d) MBDME-N2S

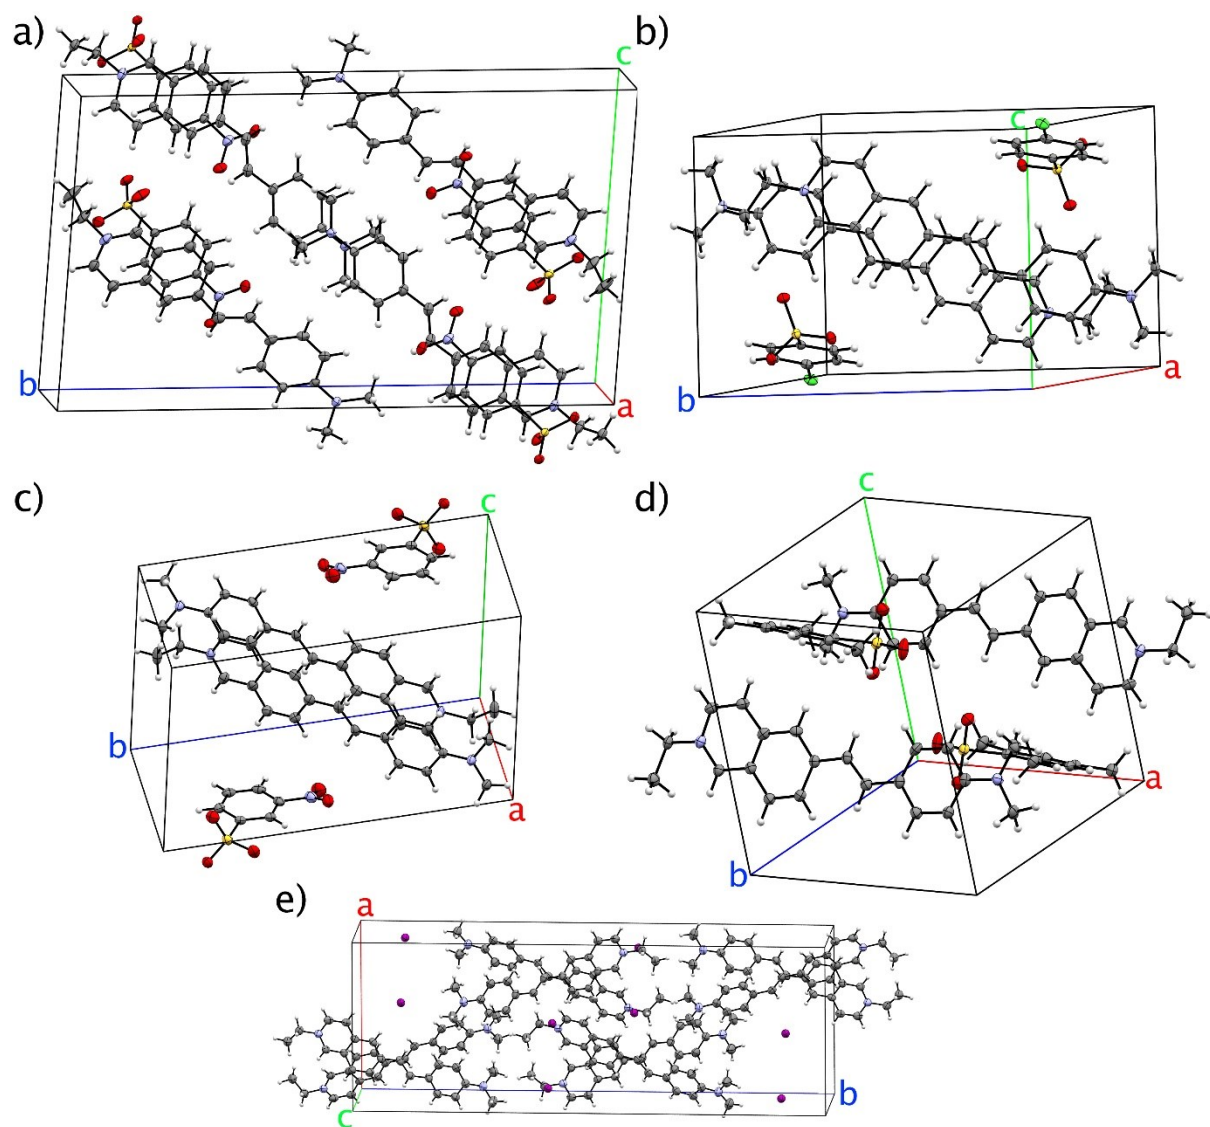

**Figure S5** 6DMIQE cation paired with different anions, a) 6DMIQE-4NBS, b) 6DMIQE-CBS, c) 6DMIQE-3NBS, d) 6DMIQE-TMS, and e) 6DMIQE-I.

### 3. Light absorption and transmission data

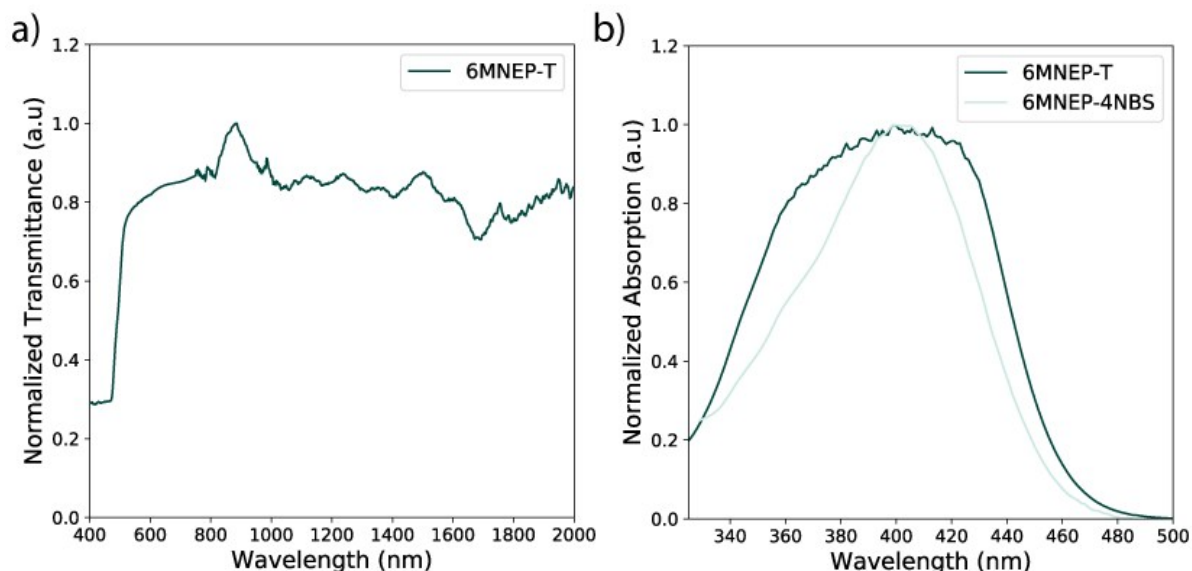

**Figure S6** a) Transmittance spectrum for a 6MNEP-T crystalline sample, and b) Methanol solution absorption measurements for 6MNEP-T and 6MNEP-4NBS.

### 4. Quantum calculations optimization

To establish a thorough comparison between the featured 6MNEP chromophores and other NLO organic crystals, we performed  $\beta$  calculations, with different DFT functionals, as detailed in **Table S1**. 6MNEP compounds showed better performance compared with DAST, HMQ-TMS, HMQ-T, and OHP-CBS with all of the tested DFT functionals. In addition, we show the data for B3LYP/NLO-V and cam-B3LYP/NLO-V calculations due to the recently shown efficiency of using this basis set to obtain fast and reliable results. The same trends as obtained with B3LYP/6-31++g\*\* were found for NLO-V calculations; therefore, we decided to use this basis set for more expensive computations. The hybrid functional B3LYP was selected because of its reliable performance for DFT calculations due to its ability to recover dynamic electron correlation. This is critical for the estimation of hyperpolarizability values that has been shown to be almost exclusively electronic in nature for NLO applications. We decided to test long range corrected CAM-B3LYP due to the larger volume of  $\pi$ -extended molecules featured in this study compared with other state-of-the-art NLO chromophores

**Table S1** Hyperpolarizability values ( $\beta_{\text{tot}}$ ) obtained at different levels of theory. B3LYP, cam-B3LYP, B3P86, and O3LYP functionals were paired with the 6-311++G\*\*. B3LYP and cam-B3LYP were also tested with the NLO-V basis set (marked with \*). Values are reported in  $10^{-30}$  esu.

| <b>Chromophore/<br/>Functional</b> | <b>DAST</b> | <b>HMQ-<br/>TMS</b> | <b>HMQ-T</b> | <b>OHP-CBS</b> | <b>6MNEP-<br/>T</b> | <b>6MNEP-<br/>4NBS</b> |
|------------------------------------|-------------|---------------------|--------------|----------------|---------------------|------------------------|
| <b>B3LYP</b>                       | 200         | 186                 | 171          | 115            | 305                 | 301                    |
| <b>B3LYP*</b>                      | 188         | 209                 | 183          | 115            | 318                 | 311                    |
| <b>cam-B3LYP</b>                   | 231         | 131                 | 138          | 110            | 252                 | 257                    |
| <b>cam-B3LYP*</b>                  | 216         | 158                 | 158          | 119            | 286                 | 290                    |
| <b>B3P86</b>                       | 197         | 186                 | 171          | 114            | 301                 | 297                    |
| <b>O3LYP</b>                       | 185         | 207                 | 183          | 158            | 312                 | 306                    |

\*NLO-V

## 5. Molecular arrangements for two and four parts calculations

**Figure S7** shows the molecular conformations employed in four cation calculations. The top layer of two cations was removed to perform two cation calculations.

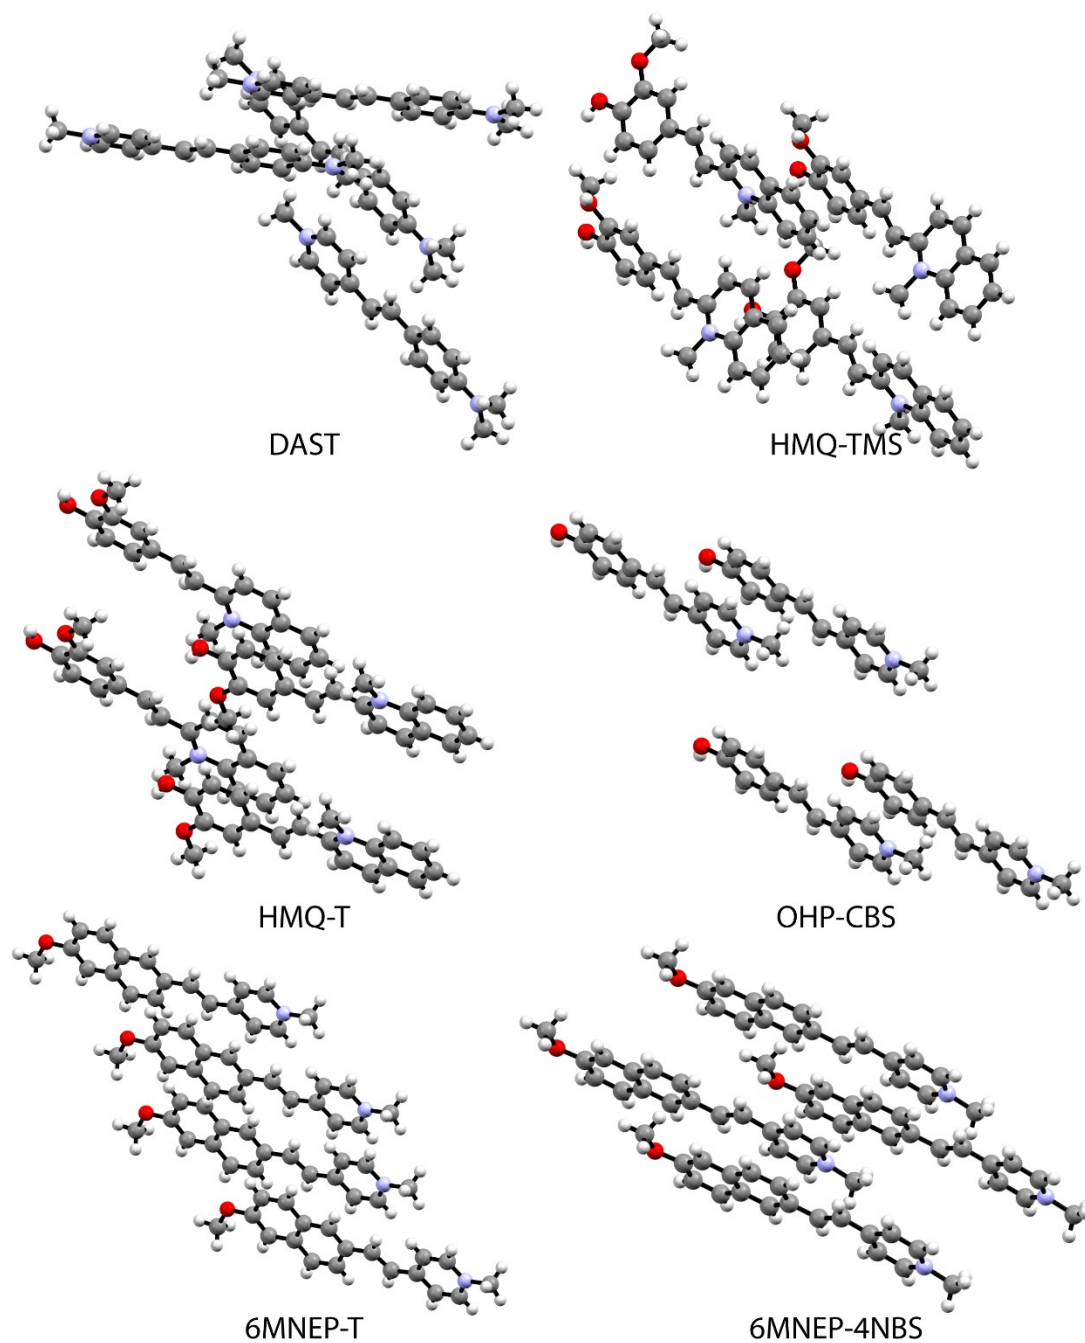

**Figure S7** Molecular conformations obtained from crystal structures and utilized to perform four parts calculations.

## 6. Differential Scanning Calorimetry Data

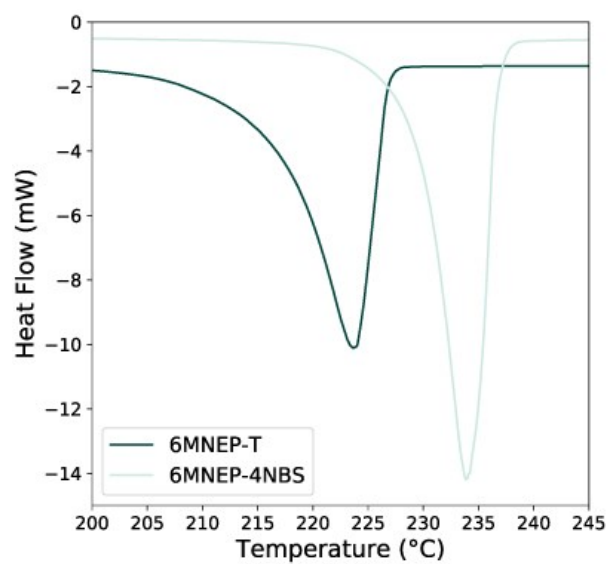

**Figure S8** Intermolecular distances for 6MNEP-T and 6MNEP-4NBS compounds.
